# Supplementary material for: Human milk and infant formula modulate the intestinal microbiota and immune systems of human microbiota-associated mice
Source: Royal Society of Chemistry journal article supplement (doi:10.1039/d0fo03004j), 2021-01-01
Supplement: d0fo03004j1.pdf [file d0fo03004j1.pdf]

## 1 Supporting Information

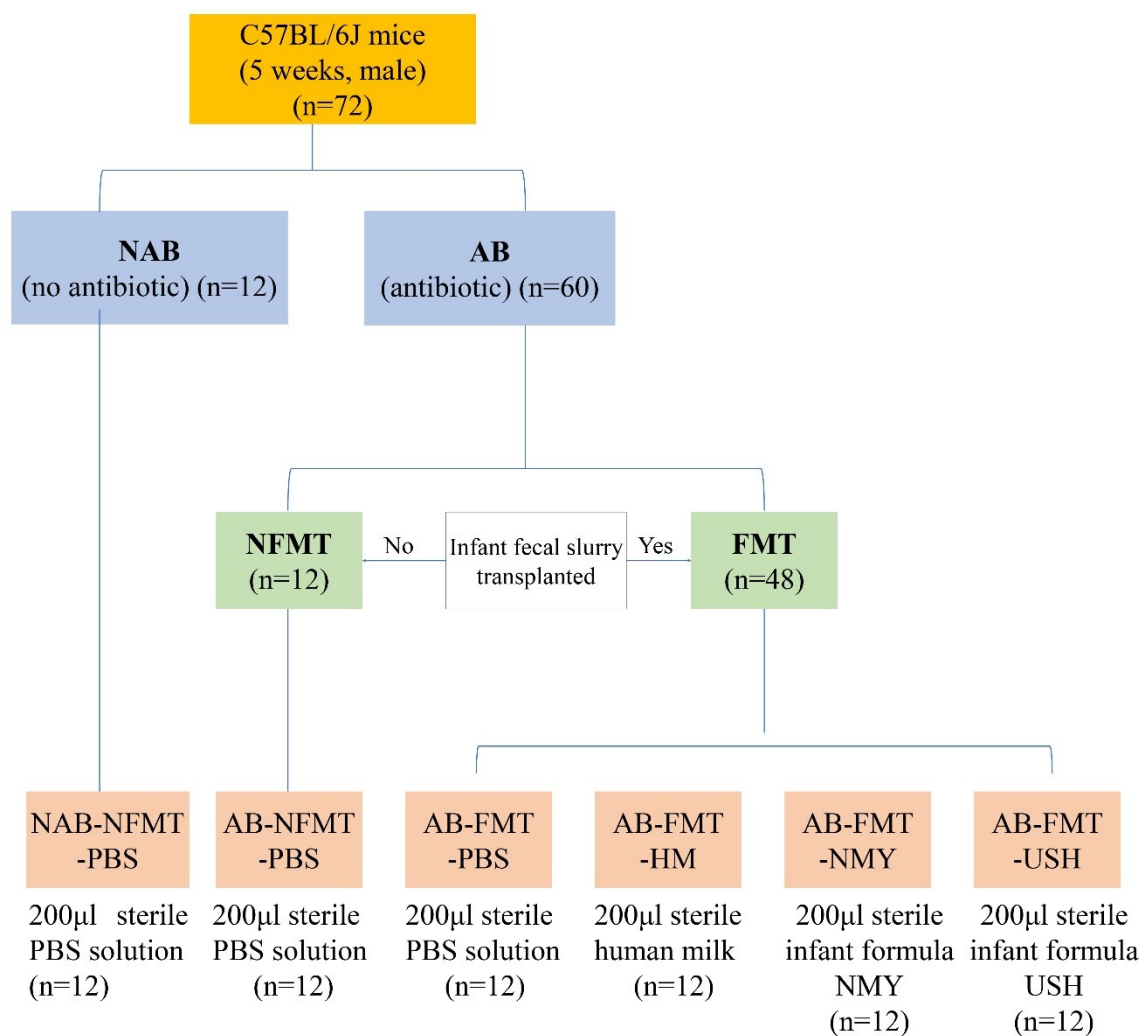

2

3 **Figure S1** Overview graph.

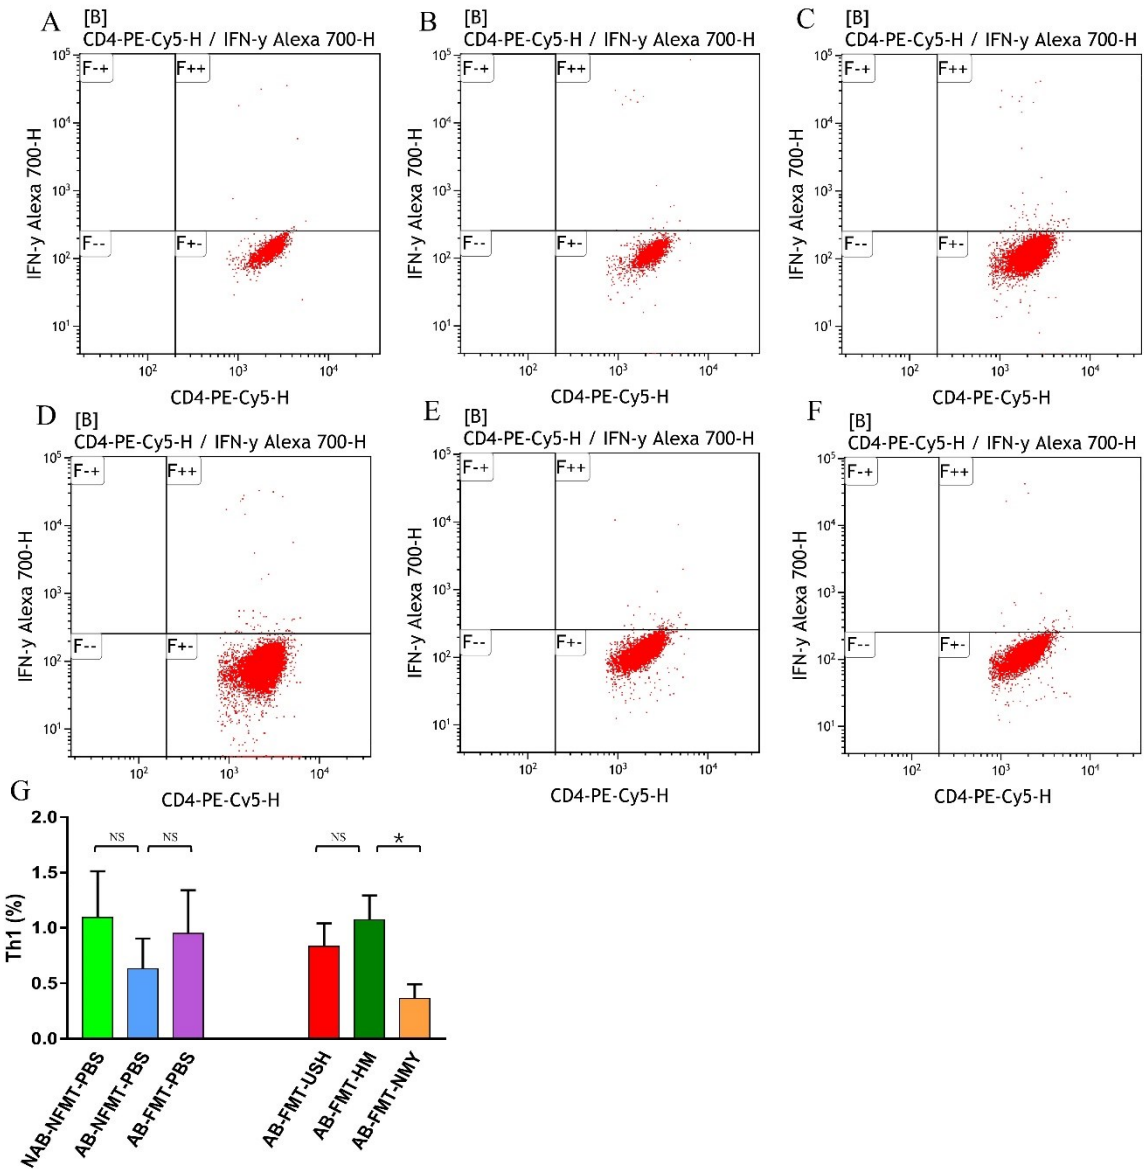

4

5 **Figure S2** Effects of the human milk and infant formula on Th1 cells (%) in peripheral blood

6 of

mice.

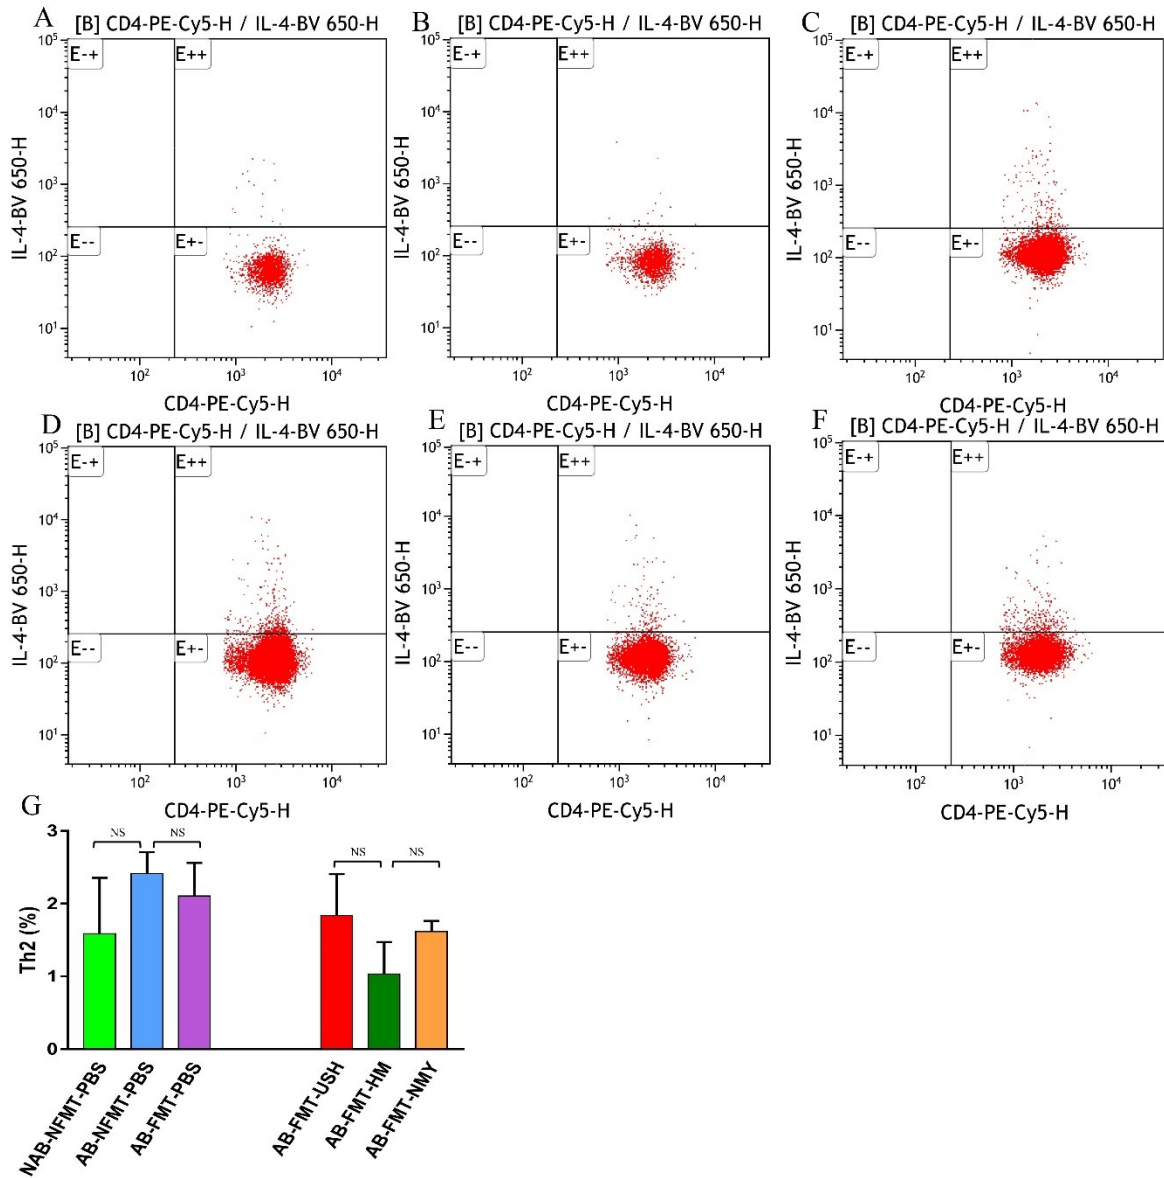

7

8 **Figure S3** Effects of the human milk and infant formula on Th2 cells (%) in peripheral blood

9 of

mice.

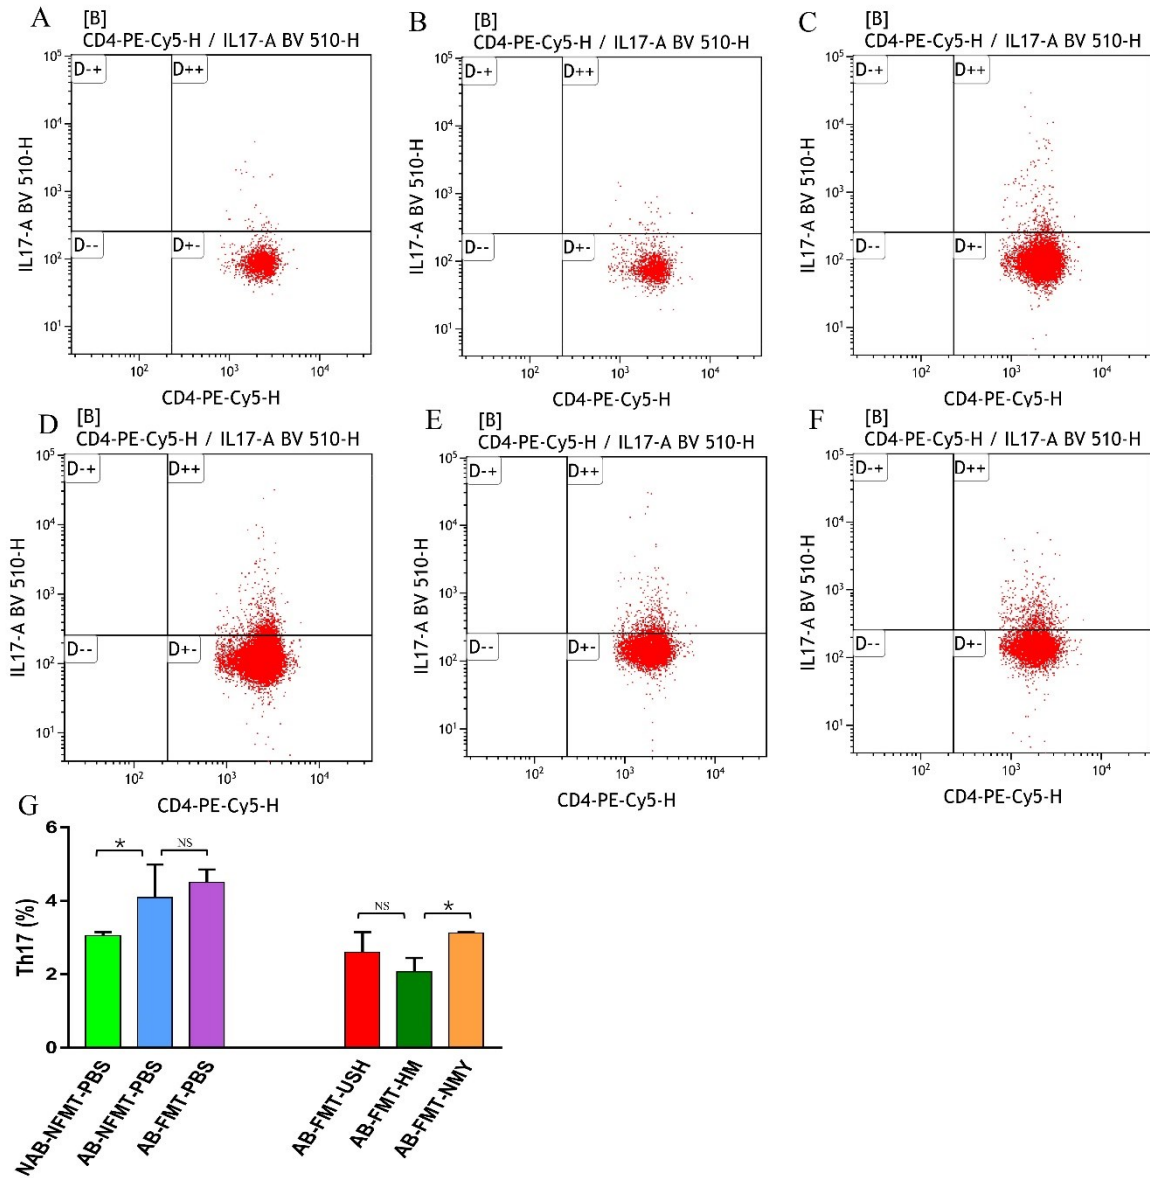

10

11 **Figure S4** Effects of the human milk and infant formula on Th17 cells (%) in peripheral

12 blood

of

mice.

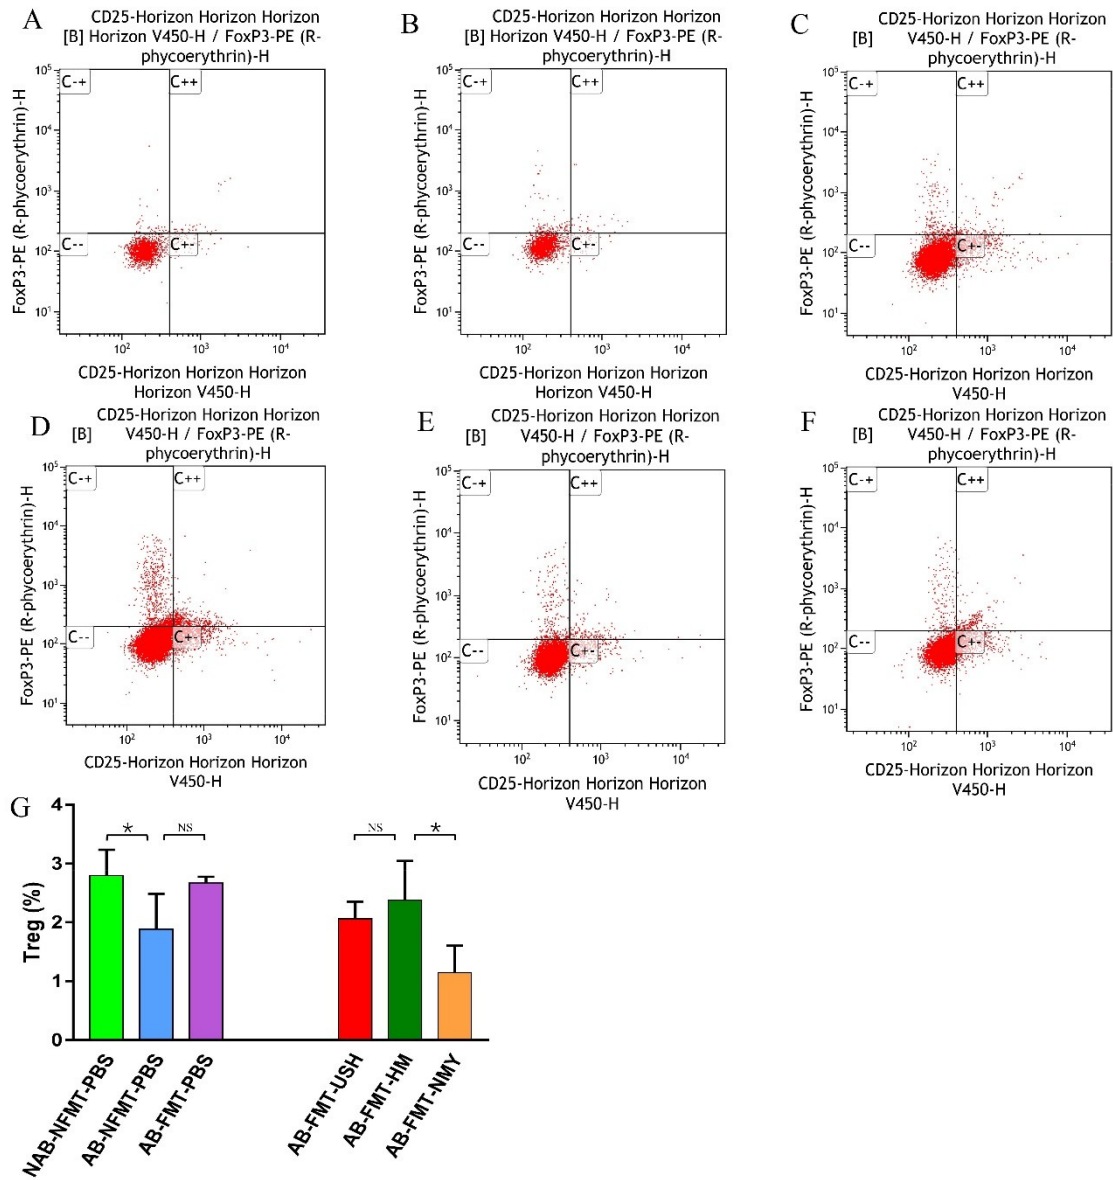

13

14 **Figure S5** Effects of the human milk and infant formula on Treg cells (%) in peripheral

15

blood of mice.

16 **Table S1** Demographic Characteristics of Three Fecal Donors.

|    | <b>Gender</b> | <b>Diet</b> | <b>Mode of delivery</b> | <b>Age (wks.days) at time of sample collection</b> | <b>Gestational age, wks.days</b> |
|----|---------------|-------------|-------------------------|----------------------------------------------------|----------------------------------|
| T1 | Male          | Human Milk  | Vaginal                 | 22.4                                               | 39.0                             |
| T2 | Male          | Human Milk  | Vaginal                 | 21.2                                               | 39.0                             |
| T3 | Female        | Human Milk  | Vaginal                 | 21.0                                               | 39.2                             |

18 **Table S2** Composition of standard laboratory chow

| Diet                   | Standard Laboratory Chow |
|------------------------|--------------------------|
| Energy composition (%) |                          |
| Carbohydrate           | 63.9%                    |
| Protein                | 20.3%                    |
| Fat                    | 15.8%                    |
| Ingredients (g/kg)     |                          |
| Casein                 | 200                      |
| L-Cystine              | 3                        |
| Corn starch            | 397                      |
| Maltodextrin           | 132                      |
| Sucrose                | 100                      |
| Cellulose              | 50                       |
| Soybean Oil            | 70                       |
| t-Butylhydroquinone    | 0.014                    |
| Mineral Mix            | 35                       |
| Vitamin Mix            | 10                       |
| Choline Bitartrate     | 2.5                      |

20 **Table S3** Detailed information of infant formulas.

| Nutrients                     | /100 kJ            |                    |
|-------------------------------|--------------------|--------------------|
|                               | Infant Formula NMY | Infant Formula USH |
| Energy/(kJ)                   | 100                | 100                |
| Protein/(g)                   | 0.52               | 0.48               |
| Fat/(g)                       | 1.30               | 1.30               |
| Linoleic Acid/(g)             | 0.20               | 0.19               |
| $\alpha$ -Linolenic Acid/(mg) | 20                 | 15.2               |
| Carbohydrate/(g)              | 2.5                | 2.49               |
| Vitamin A/( $\mu$ g RE)       | 18                 | 22.3               |
| Vitamin D/( $\mu$ g)          | 0.40               | 0.37               |
| Vitamin E/(mg $\alpha$ -TE)   | 0.33               | 0.32               |
| Vitamin K1/( $\mu$ g)         | 3.3                | 1.9                |
| Vitamin B1/( $\mu$ g)         | 26                 | 45.1               |
| Vitamin B2/( $\mu$ g)         | 28                 | 40.1               |
| Vitamin B6/( $\mu$ g)         | 19.6               | 27.1               |
| Vitamin B12/( $\mu$ g)        | 0.070              | 0.082              |
| Niacin/( $\mu$ g)             | 187                | 226                |
| Folic Acid/( $\mu$ g)         | 3.0                | 3.6                |
| Pantothenic acid /( $\mu$ g)  | 133                | 135                |
| Vitamin C/(mg)                | 2.6                | 3.3                |
| Biotin/( $\mu$ g)             | 0.7                | 0.90               |
| Sodium/(mg)                   | 6                  | 9.2                |
| Potassium/(mg)                | 17                 | 28.6               |
| Copper/( $\mu$ g)             | 16.3               | 15.5               |



---

|                  |      |       |
|------------------|------|-------|
| Magnesium/(mg)   | 1.4  | 1.6   |
| Iron/(mg)        | 0.22 | 0.29  |
| Zinc/(mg)        | 0.18 | 0.22  |
| Manganese/(µg)   | 1.4  | 1.8   |
| Calcium/(mg)     | 16   | 15.2  |
| Phosphorus/(mg)  | 10   | 8.6   |
| Iodine/(µg)      | 2.7  | 3.6   |
| Chlorine/(mg)    | 15   | 14.8  |
| Selenium/(µg)    | 0.68 | 0.72  |
| Choline/(mg)     | 4.0  | 5.8   |
| Taurine /(mg)    | 2    | 1.7   |
| DHA(%)           | 0.2  | 0.36  |
| ARA(%)           | 0.2  | 0.36  |
| GOS/(g)          | 0.07 | 0.14  |
| FOS/(g)          | 0.07 | 0.015 |
| Nucleotides/(mg) | 1.63 | 0.94  |

---

21

22
